# Supplementary material for: Targeting CD137 enhances the efficacy of cetuximab
Source: JCI journal article supplement (doi:10.1172/jci73014), 2014-05-15
Supplement: sd1 [file 1]

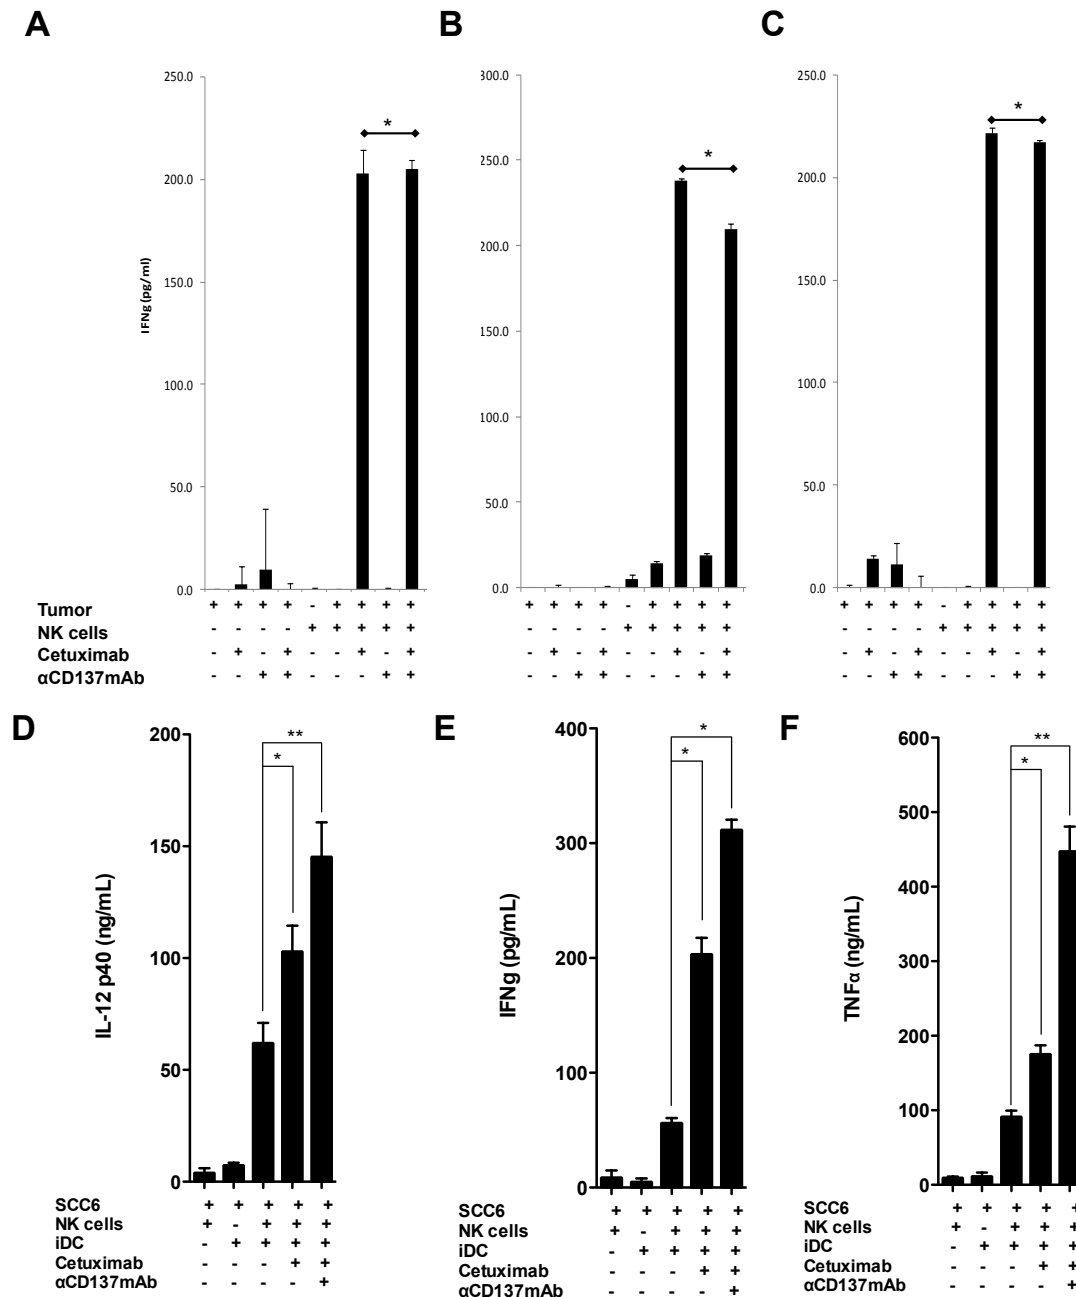

### Supplementary Figure 1

Anti-CD137 agonistic mAb does not increase cetuximab-mediated NK cell secretion of IFN- $\gamma$ , however in the presence of activated NK cells, EGFR-expressing cancer cells, cetuximab, and immature dendritic cells (iDCs) anti-CD137 agonistic mAb enhances secretion IL-12, IFN- $\gamma$ , and TNF- $\alpha$ . To evaluate NK cell function, purified NK cells were isolated from three independent, healthy donor PBMCs and cultured for 24 hours together with cetuximab (10  $\mu$ g/mL) and irradiated (5,000 rads) EGFR-expressing cancer cells (PC1) at a ratio of 1:1. After 24 hours, NK cells were isolated by negative selection and assessed for purity (>90% purity as defined by CD3<sup>+</sup>CD56<sup>+</sup> flow cytometry) and activation (>50% expression of CD137). EGFR-expressing cancer cell lines including SCC6 (A), PC1 (B), and SCC4 (C), were cultured for 18 hours with pre-activated, purified NK cells in media alone, or with anti-CD137 mAb (BMS-663513, 10  $\mu$ g/mL) alone, cetuximab (10  $\mu$ g/mL) alone, or cetuximab plus anti-CD137 mAbs (both at 10  $\mu$ g/mL) and supernatant was harvested and analyzed by ELISA for interferon- $\gamma$  (A, SCC6 \* $p$ =.49; B, PC1 \* $p$ =.012; C, SCC4 \* $p$ =.32). To evaluate iDC and NK function, purified iDCs were isolated from three independent, healthy donors and cultured with pre-activated, purified, autologous NK cells in media alone, or with anti-CD137 mAb (BMS-663513, 10  $\mu$ g/mL) alone, cetuximab (10  $\mu$ g/mL) alone, or cetuximab plus anti-CD137 mAbs (both at 10  $\mu$ g/mL) and supernatant was harvested and analyzed by ELISA for IL-12 (D, \* $p$ =.049, \*\* $p$ =.001), IFN- $\gamma$  (E \* $p$ <.001), and TNF- $\alpha$  (F \* $p$ =.004, \*\* $p$ <.001).
